# Supplementary material
Source: PubMed Central journal article supplement (PMC9903669)
Supplement: mmc1.pdf [file mmc1.pdf]

**Supplemental information**

**Genome-wide risk prediction of common diseases  
across ancestries in one million people**

**Nina Mars, Sini Kerminen, Yen-Chen A. Feng, Masahiro Kanai, Kristi Läll, Laurent F. Thomas, Anne Heidi Skogholt, Pietro della Briotta Parolo, The Biobank Japan Project, FinnGen, Benjamin M. Neale, Jordan W. Smoller, Maiken E. Gabrielsen, Kristian Hveem, Reedik Mägi, Koichi Matsuda, Yukinori Okada, Matti Pirinen, Aarno Palotie, Andrea Ganna, Alicia R. Martin, and Samuli Ripatti**

**Table S1. Number of variants included in the LDpred polygenic risk scores (PRS).** The table shows the number of variants used for calculating the PRS in each dataset shown in Figure 1. The table also shows the proportion (%) of variants out of the original LDpred-adjusted summary statistics used for calculating the PRS.

|                             | <b>CAD</b><br><i>p</i> = 0.003 |          | <b>T2D</b><br><i>p</i> = 0.003 |          | <b>Breast cancer</b><br><i>p</i> = 0.03 |          | <b>Prostate cancer</b><br><i>p</i> = 0.01 |          |
|-----------------------------|--------------------------------|----------|--------------------------------|----------|-----------------------------------------|----------|-------------------------------------------|----------|
|                             | <b>Variants</b>                | <b>%</b> | <b>Variants</b>                | <b>%</b> | <b>Variants</b>                         | <b>%</b> | <b>Variants</b>                           | <b>%</b> |
| Original summary statistics | 6 576 338                      | -        | 6 431 973                      | -        | 6 494 889                               | -        | 6 497 734                                 | -        |
| BioBank Japan               | 4 410 149                      | 67.1     | 4 344 264                      | 67.5     | 4 375 073                               | 67.4     | 4 375 963                                 | 67.3     |
| Estonian Biobank            | 6 259 397                      | 95.2     | 6 429 286                      | 100.0    | 6 490 064                               | 99.9     | 6 492 877                                 | 99.9     |
| FinnGen                     | 6 068 083                      | 92.3     | 6 320 939                      | 98.3     | 6 375 257                               | 98.2     | 6 377 882                                 | 98.2     |
| HUNT                        | 6 472 970                      | 98.4     | 6 376 169                      | 99.1     | 6 420 662                               | 98.9     | 6 423 074                                 | 98.9     |
| MGB Biobank                 |                                |          |                                |          |                                         |          |                                           |          |
| European                    | 5 911 460                      | 89.9     | 5 796 975                      | 90.1     | 5 806 787                               | 89.4     | 5 804 880                                 | 89.3     |
| African                     | 5 086 035                      | 77.3     | 4 881 847                      | 75.9     | 4 918 230                               | 75.7     | 4 917 955                                 | 75.7     |
| UK Biobank                  |                                |          |                                |          |                                         |          |                                           |          |
| European                    |                                |          |                                |          |                                         |          |                                           |          |
| African / Caribbean         | 6 165 767                      | 93.8     | 6 422 449                      | 99.9     | 6 480 780                               | 99.8     | 6 483 638                                 | 99.8     |
| South Asian                 |                                |          |                                |          |                                         |          |                                           |          |

CAD = coronary artery disease, T2D = type 2 diabetes. *p* denotes the LDpred parameter for the fraction of causal variants in the selected PRS. The PRSs with the best discriminative capacity (measured with maximum area under the receiver-operator curve, AUC) were chosen based on an earlier FinnGen data freeze (DF4) with 176,899 individuals.

**Table S2. Effect sizes, and case and control counts corresponding to Figure 1.** Odds ratios (OR) with 95% confidence intervals (CI) are presented for 1-SD increase in the polygenic risk scores.

|                                 | Disease         | OR   | 95% CI      | p-value for test of heterogeneity | Number of cases | Number of controls |
|---------------------------------|-----------------|------|-------------|-----------------------------------|-----------------|--------------------|
| <b>Figure 1, Panel A</b>        |                 |      |             |                                   |                 |                    |
| MGB Biobank, African            | CAD             | 1.10 | 0.96-1.26   | 0.06                              | 285             | 1 250              |
| UK Biobank, African / Caribbean | CAD             | 1.32 | 1.13-1.54   |                                   | 169             | 7 459              |
| BioBank Japan                   | CAD             | 1.32 | 1.30-1.34   |                                   | 29 080          | 149 646            |
| UK Biobank, South Asian         | CAD             | 1.41 | 1.30-1.53   |                                   | 740             | 6 888              |
| European (pooled estimate)      | CAD             | 1.54 | 1.53-1.55   |                                   | -               | -                  |
| MGB Biobank, African            | T2D             | 1.24 | 1.09-1.42   | 7.38e-06                          | 660             | 875                |
| UK Biobank, African / Caribbean | T2D             | 1.46 | 1.32-1.62   |                                   | 691             | 6 656              |
| BioBank Japan                   | T2D             | 1.37 | 1.36-1.39   |                                   | 40 121          | 137 024            |
| UK Biobank, South Asian         | T2D             | 1.66 | 1.55-1.79   |                                   | 1 120           | 6 145              |
| European (pooled estimate)      | T2D             | 1.62 | 1.61-1.64   |                                   | -               | -                  |
| MGB Biobank, African            | Breast cancer   | 0.90 | 0.69-1.17   | 0.03                              | 64              | 879                |
| UK Biobank, African / Caribbean | Breast cancer   | 1.12 | 0.93-1.35   |                                   | 132             | 4 210              |
| BioBank Japan                   | Breast cancer   | 1.25 | 1.21-1.28   |                                   | 5 316           | 69 629             |
| UK Biobank, South Asian         | Breast cancer   | 1.47 | 1.23-1.75   |                                   | 139             | 3 375              |
| European (pooled estimate)      | Breast cancer   | 1.49 | 1.47-1.51   |                                   | -               | -                  |
| MGB Biobank, African            | Prostate cancer | 1.19 | 0.91-1.55   | 0.001                             | 80              | 512                |
| UK Biobank, African / Caribbean | Prostate cancer | 1.35 | 1.14-1.61   |                                   | 199             | 3 077              |
| BioBank Japan                   | Prostate cancer | 1.69 | 1.64-1.74   |                                   | 5 192           | 90 773             |
| UK Biobank, South Asian         | Prostate cancer | 2.21 | 1.73-2.81   |                                   | 72              | 4 042              |
| European (pooled estimate)      | Prostate cancer | 1.89 | 1.86-1.92   |                                   | -               | -                  |
| <b>Figure 1, Panel B</b>        |                 |      |             |                                   |                 |                    |
| MGB Biobank, European           | CAD             | 1.35 | 1.29 - 1.40 | 3.55e-28                          | 3 206           | 22 490             |
| Estonian Biobank                | CAD             | 1.47 | 1.43 - 1.52 |                                   | 5 064           | 105 533            |
| FinnGen                         | CAD             | 1.53 | 1.50 - 1.55 |                                   | 25 706          | 232 696            |
| HUNT                            | CAD             | 1.44 | 1.40 - 1.48 |                                   | 6 594           | 62 827             |
| UK Biobank, European            | CAD             | 1.64 | 1.61 - 1.67 |                                   | 17 986          | 325 690            |
| MGB Biobank, European           | T2D             | 1.46 | 1.41 - 1.51 | 3.48e-35                          | 5 182           | 20 514             |
| Estonian Biobank                | T2D             | 1.55 | 1.51 - 1.59 |                                   | 7 066           | 103 531            |
| FinnGen                         | T2D             | 1.58 | 1.56 - 1.60 |                                   | 37 001          | 213 319            |
| HUNT                            | T2D             | 1.64 | 1.60 - 1.69 |                                   | 5 228           | 64 191             |
| UK Biobank, European            | T2D             | 1.78 | 1.75 - 1.81 |                                   | 13 616          | 326 173            |

|                       |                 |      |             |          |        |           |
|-----------------------|-----------------|------|-------------|----------|--------|-----------|
| MGB Biobank, European | Breast cancer   | 1.45 | 1.38 - 1.54 |          | 1 513  | 12 139    |
| Estonian Biobank      | Breast cancer   | 1.45 | 1.37 - 1.53 |          | 1 379  | 73<br>053 |
| FinnGen               | Breast cancer   | 1.48 | 1.45 - 1.51 | 0.63     | 11 573 | 134 561   |
| HUNT                  | Breast cancer   | 1.50 | 1.43 - 1.58 |          | 1 731  | 35 053    |
| UK Biobank, European  | Breast cancer   | 1.50 | 1.47 - 1.53 |          | 11 075 | 173 498   |
| MGB Biobank, European | Prostate cancer | 1.66 | 1.57 - 1.76 |          | 1 593  | 10 451    |
| Estonian Biobank      | Prostate cancer | 1.79 | 1.68 - 1.91 |          | 1 202  | 34<br>963 |
| FinnGen               | Prostate cancer | 1.96 | 1.91 - 2.01 | 2.91e-07 | 8 709  | 103 559   |
| HUNT                  | Prostate cancer | 1.80 | 1.72 - 1.88 |          | 2 224  | 30 413    |
| UK Biobank, European  | Prostate cancer | 1.91 | 1.86 - 1.96 |          | 7 429  | 151 674   |

**Figure 1, Panel C**

|                  |                 |      |           |      |        |         |
|------------------|-----------------|------|-----------|------|--------|---------|
| Early settlement | CAD             | 1.54 | 1.51-1.58 |      | 12 487 | 131 981 |
| Borderline       | CAD             | 1.51 | 1.45-1.56 | 0.56 | 4 809  | 42 888  |
| Late settlement  | CAD             | 1.54 | 1.50-1.59 |      | 6 837  | 51 283  |
| Early settlement | T2D             | 1.59 | 1.56-1.62 |      | 19 937 | 119 799 |
| Borderline       | T2D             | 1.55 | 1.51-1.60 | 0.32 | 6 636  | 39 561  |
| Late settlement  | T2D             | 1.59 | 1.55-1.63 |      | 9 045  | 47 429  |
| Early settlement | Breast cancer   | 1.49 | 1.45-1.53 |      | 6 866  | 75 151  |
| Borderline       | Breast cancer   | 1.48 | 1.42-1.55 | 0.70 | 2 098  | 25 506  |
| Late settlement  | Breast cancer   | 1.46 | 1.40-1.52 |      | 2 260  | 29 856  |
| Early settlement | Prostate cancer | 1.93 | 1.87-1.99 |      | 5 161  | 57 290  |
| Borderline       | Prostate cancer | 2.09 | 1.97-2.22 | 0.07 | 1 451  | 18 642  |
| Late settlement  | Prostate cancer | 1.95 | 1.84-2.06 |      | 1 651  | 24 353  |

CAD = coronary artery disease, T2D = type 2 diabetes. In Panel A, ORs from Panel B are combined by random effects meta-analysis to the European pooled estimate; In Panel C, out of 258,402 in FinnGen, 8,117 individuals were excluded, comprising 3,157 born abroad, 4,304 born in regions ceded to Soviet, 182 born in Åland Islands, and 474 with missing data. Detailed information of the Finnish regions in Panel C provided in supplementary methods. P-value for heterogeneity was calculated based on Cochran's heterogeneity statistic.

**Table S3. Comparison of polygenic risk scores (PRS) in UK Biobank.** Related to Figure 2, the table shows a comparison of PRSs developed with different methodologies. The decreases in effect sizes were calculated from regression estimates (log odds). The number of cases and controls in each category is listed in Table 1.

|                                | OR   | 95% CI    | Decrease in effect size compared to European ancestry | Decrease in effect size compared to PRS-CS in European ancestry | Decrease in effect size compared to PRS-CS in South Asian ancestry | Decrease in effect size compared to PRS-CS in African / Caribbean ancestry |
|--------------------------------|------|-----------|-------------------------------------------------------|-----------------------------------------------------------------|--------------------------------------------------------------------|----------------------------------------------------------------------------|
| <b>Coronary artery disease</b> |      |           |                                                       |                                                                 |                                                                    |                                                                            |
| Limited-variant PRS            |      |           |                                                       |                                                                 |                                                                    |                                                                            |
| European                       | 1.41 | 1.39-1.43 | Ref                                                   | 64 %                                                            |                                                                    |                                                                            |
| South Asian                    | 1.34 | 1.23-1.46 | 85 %                                                  |                                                                 | 61 %                                                               |                                                                            |
| African / Caribbean            | 1.18 | 0.96-1.46 | 49 %                                                  |                                                                 |                                                                    | 63 %                                                                       |
| LDpred PRS                     |      |           |                                                       |                                                                 |                                                                    |                                                                            |
| European                       | 1.64 | 1.61-1.67 | Ref                                                   | 93 %                                                            |                                                                    |                                                                            |
| South Asian                    | 1.41 | 1.30-1.53 | 69 %                                                  |                                                                 | 71 %                                                               |                                                                            |
| African / Caribbean            | 1.32 | 1.13-1.54 | 56 %                                                  |                                                                 |                                                                    | 104 %                                                                      |
| PRS-CS PRS                     |      |           |                                                       |                                                                 |                                                                    |                                                                            |
| European                       | 1.70 | 1.68-1.73 | Ref                                                   | Ref                                                             |                                                                    |                                                                            |
| South Asian                    | 1.61 | 1.48-1.75 | 90 %                                                  |                                                                 | Ref                                                                |                                                                            |
| African / Caribbean            | 1.30 | 1.12-1.52 | 56 %                                                  |                                                                 |                                                                    | Ref                                                                        |
| <b>Type 2 diabetes</b>         |      |           |                                                       |                                                                 |                                                                    |                                                                            |
| Limited-variant PRS            |      |           |                                                       |                                                                 |                                                                    |                                                                            |
| European                       | 1.69 | 1.66-1.72 | Ref                                                   | 92 %                                                            |                                                                    |                                                                            |
| South Asian                    | 1.61 | 1.50-1.74 | 91 %                                                  |                                                                 | 98 %                                                               |                                                                            |
| African / Caribbean            | 1.35 | 1.22-1.49 | 57 %                                                  |                                                                 |                                                                    | 89 %                                                                       |
| LDpred PRS                     |      |           |                                                       |                                                                 |                                                                    |                                                                            |
| European                       | 1.78 | 1.75-1.81 | Ref                                                   | 101 %                                                           |                                                                    |                                                                            |
| South Asian                    | 1.66 | 1.55-1.79 | 88 %                                                  |                                                                 | 105 %                                                              |                                                                            |
| African / Caribbean            | 1.46 | 1.32-1.62 | 65 %                                                  |                                                                 |                                                                    | 113 %                                                                      |
| PRS-CS PRS                     |      |           |                                                       |                                                                 |                                                                    |                                                                            |
| European                       | 1.77 | 1.74-1.80 | Ref                                                   | Ref                                                             |                                                                    |                                                                            |
| South Asian                    | 1.63 | 1.51-1.75 | 85 %                                                  |                                                                 | Ref                                                                |                                                                            |
| African / Caribbean            | 1.40 | 1.25-1.55 | 58 %                                                  |                                                                 |                                                                    | Ref                                                                        |
| <b>Breast cancer</b>           |      |           |                                                       |                                                                 |                                                                    |                                                                            |
| Limited-variant PRS            |      |           |                                                       |                                                                 |                                                                    |                                                                            |
| European                       | 1.64 | 1.61-1.67 | Ref                                                   | 86 %                                                            |                                                                    |                                                                            |
| South Asian                    | 1.36 | 1.14-1.62 | 62 %                                                  |                                                                 | 65 %                                                               |                                                                            |
| African / Caribbean            | 1.34 | 1.13-1.60 | 60 %                                                  |                                                                 |                                                                    | 70 %                                                                       |
| LDpred PRS                     |      |           |                                                       |                                                                 |                                                                    |                                                                            |
| European                       | 1.50 | 1.47-1.53 | Ref                                                   | 71 %                                                            |                                                                    |                                                                            |
| South Asian                    | 1.47 | 1.23-1.75 | 95 %                                                  |                                                                 | 81 %                                                               |                                                                            |
| African / Caribbean            | 1.12 | 0.93-1.35 | 28 %                                                  |                                                                 |                                                                    | 27 %                                                                       |
| PRS-CS PRS                     |      |           |                                                       |                                                                 |                                                                    |                                                                            |
| European                       | 1.77 | 1.74-1.81 | Ref                                                   | Ref                                                             |                                                                    |                                                                            |
| South Asian                    | 1.61 | 1.35-1.92 | 83 %                                                  |                                                                 | Ref                                                                |                                                                            |
| African / Caribbean            | 1.53 | 1.27-1.84 | 74 %                                                  |                                                                 |                                                                    | Ref                                                                        |
| <b>Prostate cancer</b>         |      |           |                                                       |                                                                 |                                                                    |                                                                            |
| Limited-variant PRS            |      |           |                                                       |                                                                 |                                                                    |                                                                            |
| European                       | 2.20 | 2.14-2.25 | Ref                                                   | 104 %                                                           |                                                                    |                                                                            |
| South Asian                    | 2.06 | 1.60-2.64 | 92 %                                                  |                                                                 | 77 %                                                               |                                                                            |
| African / Caribbean            | 1.72 | 1.46-2.02 | 69 %                                                  |                                                                 |                                                                    | 151 %                                                                      |
| LDpred PRS                     |      |           |                                                       |                                                                 |                                                                    |                                                                            |
| European                       | 1.91 | 1.86-1.96 | Ref                                                   | 85 %                                                            |                                                                    |                                                                            |
| South Asian                    | 2.21 | 1.73-2.81 | 123 %                                                 |                                                                 | 85 %                                                               |                                                                            |
| African / Caribbean            | 1.35 | 1.14-1.61 | 47 %                                                  |                                                                 |                                                                    | 84 %                                                                       |
| PRS-CS PRS                     |      |           |                                                       |                                                                 |                                                                    |                                                                            |
| European                       | 2.14 | 2.09-2.19 | Ref                                                   | Ref                                                             |                                                                    |                                                                            |
| South Asian                    | 2.54 | 1.98-3.26 | 123 %                                                 |                                                                 | Ref                                                                |                                                                            |
| African / Caribbean            | 1.43 | 1.21-1.69 | 47 %                                                  |                                                                 |                                                                    | Ref                                                                        |

**Table S4. Information on genome-wide association study (GWAS) summary statistics.** Information on GWAS used for constructing the polygenic risk scores in Figure 1.

| <b>Disease</b>          | <b>GWAS</b>                                                                                                            | <b>Ethnicity</b>                                       | <b>N Cases / N Controls</b> | <b>Proportion of test datasets overlapping with GWAS</b> |
|-------------------------|------------------------------------------------------------------------------------------------------------------------|--------------------------------------------------------|-----------------------------|----------------------------------------------------------|
| Coronary artery disease | Nikpay et al.<br><a href="https://doi.org/10.1038/ng.3396">https://doi.org/10.1038/ng.3396</a>                         | European 77%, 13% South Asian, 6% East Asian, 4% other | 60,801 / 123,504            | 5.9% of Estonian Biobank, 2.0% of FinnGen                |
| Type 2 diabetes         | Scott et al.<br><a href="https://doi.org/10.2337/db16-1253">https://doi.org/10.2337/db16-1253</a>                      | European                                               | 26,676 / 132,532            | 7.5% of Estonian Biobank                                 |
| Breast cancer           | Michailidou et al.<br><a href="https://doi.org/10.1038/nature24284">https://doi.org/10.1038/nature24284</a>            | European 89%, East Asian 11%                           | 137,045 / 119,078           | No overlap detected                                      |
| Prostate cancer         | Schumacher et al.<br><a href="https://doi.org/10.1038/s41588-018-0142-8">https://doi.org/10.1038/s41588-018-0142-8</a> | European                                               | 46,939 / 27,910             | No overlap detected                                      |

**Figure S1. Impact of LDpred parameter choice.** Effect sizes across ancestries in UK Biobank with the different default fractions of causal variants with LDpred. Odds ratios (OR) with 95% confidence intervals (CI) are shown for 1-SD increase in the polygenic risk scores. The fraction of causal variants used in the main analyses in Figure 1 are bolded. The number of cases and controls in each category is listed in Table 1.

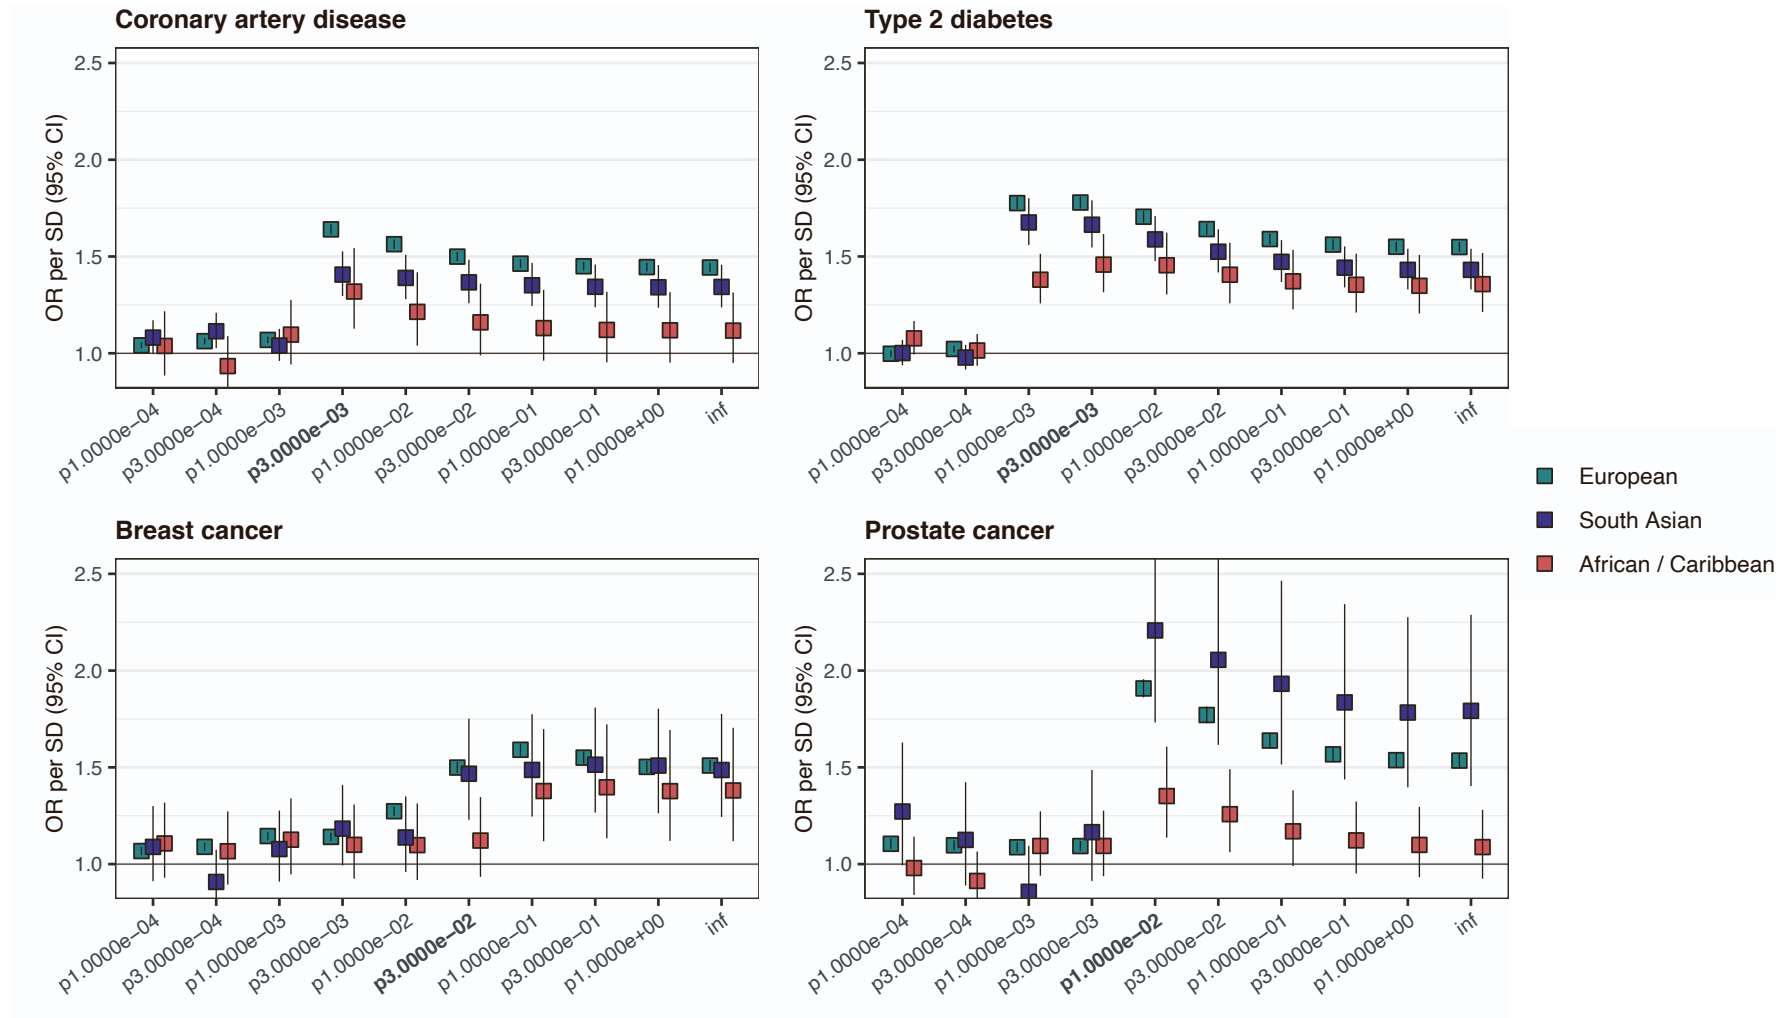

**Figure S2. Detailed effect size comparison across early- and late-settlement regions in Finland.** The figure shows detailed results by region within the settlement regions shown in Figure 1 panel C, using the same PRSs as in Figure 1. The early-settlement region is shown in blue, the late-settlement region in red, and the borderline region in gray.

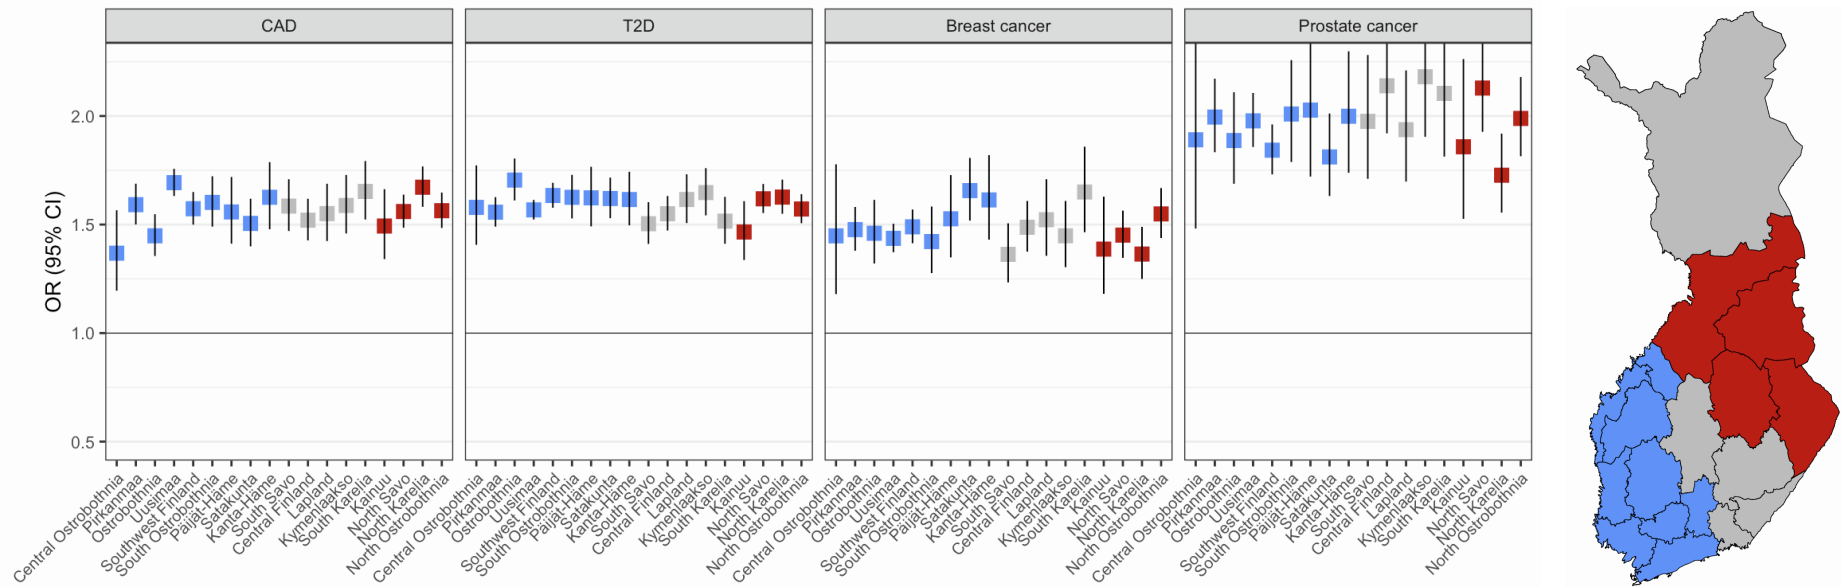

OR = odds ratio, CAD = coronary artery disease, T2D = type 2 diabetes. Regions are based on data on birthplace. Out of 258,402 individuals in FinnGen, 8,117 individuals excluded, including 3,157 born abroad, 4,304 born in regions ceded to Soviet, 182 born in Åland Islands (not shown in the map due to the exclusion; excluded due to low sample size), and 474 with missing data.
